# Supplementary material for: Novel Variants of PPP2R1A in Catalytic Subunit Binding Domain and Genotype–Phenotype Analysis in Neurodevelopmentally Delayed Patients
Source: MDPI journal article supplement (doi:10.3390/genes14091750), 2023-09-01
Supplement: s1 [file s1]

Supplementary Table S1. The clinical features of the patients carried likely pathogenic/ pathogenic variants of PPP2R1A

| Individual            | 1                    | 2                    | 3                    | 4                                           | 5                              | 6                                             | 7                    | 8                                               | 9                                         |
|-----------------------|----------------------|----------------------|----------------------|---------------------------------------------|--------------------------------|-----------------------------------------------|----------------------|-------------------------------------------------|-------------------------------------------|
| Age/Sex               | 11y/F                | 4y/M                 | 18y/M                | 18y/F                                       | 12y/M                          | 4y/M                                          | 3.5y/F               | 5m/F                                            | 27y/M                                     |
| Variant               | c.96C>G,<br>p.I32M   | c.421T>A,<br>p.F141I | c.455C>T,<br>p.S152F | c.532A>T,<br>p.T178S                        | c.533C>A,<br>p.T178N           | c.536C>T,<br>p.P179L                          | c.536C>T,<br>p.P179L | c.536C>A,<br>p.P179H                            | c.538A>G,<br>p.M180V                      |
| Inheritance           | <i>De novo</i>       | <i>De novo</i>       | <i>De novo</i>       | <i>De novo</i>                              | <i>De novo</i>                 | <i>De novo</i>                                | <i>De novo</i>       | <i>De novo</i>                                  | <i>De novo</i>                            |
| Birth size            | N                    | N                    | N                    | /                                           | /                              | N                                             | N                    | N                                               | N                                         |
| Height                | N                    | N                    | N                    | N                                           | N                              | -3SD                                          | N                    | N                                               | N                                         |
| Head circumference    | N                    | macro                | N                    | +5.1SD                                      | +2SD                           | micro                                         | micro                | micro                                           | +2SD                                      |
| DD/ID                 | ID,<br>moderate      | ID, severe           | IQ 86                | ID, moderate                                | ID, severe                     | ID, severe                                    | ID, severe           | ID/DD                                           | ID, moderate                              |
| Language delay        | moderate             | Moderate             | Mild                 | mild                                        | Severe                         | Severe                                        | No words             | /                                               | Mild                                      |
| Motor delay           | -                    | + (walk 4y9m)        | -(walk 15m)          | +(walk 2y)                                  | +(walk 5y)                     | + (can't walk)                                | + (can't walk)       | /                                               | + (walk 2y)                               |
| Epilepsy              | Moderate             | -                    | -                    | -                                           | -                              | moderate                                      | -                    | -                                               | -                                         |
| Brain MR              | N                    | N                    | N                    | /                                           | N                              | CCA,<br>ventriculomegaly                      | CCA                  | CCA, white<br>matter diffuse<br>thinning, et al | N                                         |
| Behavior problem      | ASD, self-<br>injury | ADHD                 | ASD                  | anxious                                     | ADHD,<br>destructive           | /                                             | /                    | /                                               | ASD                                       |
| Hypotonia             | +                    | +                    | -                    | +                                           | +                              | +                                             | +                    | +                                               | Moderate                                  |
| Feeding problem       | -                    | GR                   | -                    | -                                           | +                              | TPN, G-tube                                   | /                    | +                                               | -                                         |
| Hearing loss          | -                    | -                    | -                    | -                                           | +                              | /                                             | /                    | -                                               | -                                         |
| Extremities/<br>spine | Hyperperm.           | Hyperperm.           | Hyperperm.           | cubitus valgus,<br>kyphoscoliosis,<br>et al | Hyperperm.<br>scoliosis, et al | hip & knee<br>dislocations,<br>kyphoscoliosis | /                    | /                                               | Hyperperm.,<br>thoracolumbar<br>scoliosis |
| Heart                 | N                    | N                    | N                    | /                                           | /                              | PDA                                           | /                    | ASD, PFO                                        | /                                         |
| PMID                  | 33106617             | 33106617             | 33106617             | 33106617                                    | 33106617                       | 33106617                                      | 26168268             | 36209351                                        | 33106617                                  |

Supplementary Table S1. The clinical features of the patients carried likely pathogenic/ pathogenic variants of PPP2R1A (continue)

[illegible]

Supplementary Table S1. The clinical features of the patients carried likely pathogenic/ pathogenic variants of PPP2R1A (continue)

| Individual         | 20                   | 21                   | 22                                | 23                   | 24                   | 25                   | 26                                                | 27                                                          | 28                                |
|--------------------|----------------------|----------------------|-----------------------------------|----------------------|----------------------|----------------------|---------------------------------------------------|-------------------------------------------------------------|-----------------------------------|
| Age/Sex            | 4y/M                 | 3y/F                 | 7m, F                             | 4y/F                 | 11y/M                | 1y/F                 | 2y/M                                              | Neonate/M                                                   | Neonate/M                         |
| Variant            | c.544C>T,<br>p.R182W | c.544C>T,<br>p.R182W | c.544C>T,<br>p.R182W              | c.544C>T,<br>p.R182W | c.544C>T,<br>p.R182W | c.544C>T,<br>p.R182W | c.547C>T,<br>p.R183W                              | c.548G>A, p.R183Q                                           | c.548G>A,<br>p.R183Q              |
| Inheritance        | <i>De novo</i>       |                      | NA                                | <i>De novo</i>       | <i>De novo</i>       | <i>De novo</i>       | <i>De novo</i>                                    | <i>De novo</i>                                              | Not maternal                      |
| Birth size         | N                    | SGA                  | N                                 | N                    | N                    | N                    | N                                                 | N                                                           | small                             |
| Height             | N                    | N                    | N                                 | +2SD                 | N                    | N                    | -2.5SD                                            | N                                                           | /                                 |
| Head circumference | N                    | N                    | 42 cm (25%)                       | N                    | micro                | macro                | N                                                 | macro                                                       | macro                             |
| DD/ID              | ID, severe           | ID, severe           | ID/DD                             | ID, severe           | ID, severe           | ID, severe           | ID, severe                                        | /                                                           | /                                 |
| Language delay     | severe               | severe               | +                                 | No words             | No words             | / ( no word)         | severe                                            | /                                                           | /                                 |
| Motor delay        | + (can't walk)       | + (can't walk)       | +(can't sit 4.5y)                 | + (can't walk)       | +(walk 6y)           | / (no walk)          | +                                                 | /                                                           | /                                 |
| Epilepsy           | -                    | severe               | +                                 | +                    | +                    | +                    | +                                                 | +                                                           | +                                 |
| Brain MR           | CCH                  | CCA                  | CCA, brain stem hypoplasia, et al | CCH                  | CCH                  | CCA                  | ventriculomegaly, hydrocephalus, pachygyria et al | bilateral ventriculomegaly, enlarged third ventricle, et al | CCA, hypoplastic brainstem, et al |
| Behavior problem   | /                    | Hand chews           | /                                 | /                    | /                    | /                    | /                                                 | /                                                           | /                                 |
| Hypotonia          | severe               | severe               | /                                 | +                    | +                    | +                    | +                                                 | /                                                           | +                                 |
| Feeding problem    | /                    | +                    | +                                 | /                    | +                    | /                    | PEG                                               | +                                                           | +                                 |
| Hearing loss       | /                    | -                    | /                                 | /                    | /                    | /                    | /                                                 | /                                                           | /                                 |
| Extremities/spine  | /                    | /                    | /                                 | scoliosis            | Scoliosis, hyperm.   | /                    | scoliosis                                         | /                                                           | /                                 |
| Heart              | /                    | N                    | PS, PFO                           | /                    | /                    | /                    | /                                                 | +                                                           | Multiple abnormal                 |
| PMID               | 33106617             | 25533962             | 36209351                          | 26168268             | 26168268             | 26168268             | 33106617                                          | 31687265                                                    | 36209351                          |

| Individual         | 29                      | 30                   | 31                   | 32                   | 33                   | 34                   | 35                   | 36                   | 37                   | 38                   |
|--------------------|-------------------------|----------------------|----------------------|----------------------|----------------------|----------------------|----------------------|----------------------|----------------------|----------------------|
| Age/Sex            | Neonate/M               | 20y/M                | 2y4m/M               | 7y/M                 | 9m/M                 | 4y/F                 | 7y/F                 | 3y/M                 | 4y/M                 | 13m/M                |
| Variant            | c.548G>A,<br>p.R183Q    | c.656C>T,<br>p.S219L | c.656C>T,<br>p.S219L | c.656C>T,<br>p.S219L | c.656C>T,<br>p.S219L | c.658G>A,<br>p.V220M | c.658G>A,<br>p.V220M | c.658G>A,<br>p.V220M | c.658G>A,<br>p.V220M | c.772C>A,<br>p.R258S |
| Inheritance        | <i>De novo</i>          | <i>De novo</i>       | <i>De novo</i>       | <i>De novo</i>       | <i>De novo</i>       | <i>De novo</i>       | <i>De novo</i>       | <i>De novo</i>       | <i>De novo</i>       | <i>De novo</i>       |
| Birth size         | N                       | N                    | N                    | N                    | N                    | N                    | SGA                  | SGA                  | N                    | N                    |
| Height             | /                       | N                    | N                    | N                    | SS                   | N                    | /                    | N                    | N                    | N                    |
| Head circumference | macro                   | -2SD                 | N                    | N                    | Micro                | /                    | -2.5SD               | N                    | N                    | -3.1SD               |
| DD/ID              | /                       | ID,<br>moderate      | ID,<br>moderate      | DD                   | /                    | ID, mild             | ID,<br>moderate      | ID, mild             | ID,<br>moderate      | DD                   |
| Language delay     | /                       | Mild                 | moderate             | mild                 | /                    | Severe               | severe               | Moderate             | moderate             | /                    |
| Motor delay        | /                       | +                    | +                    | +                    | /                    | /                    | +                    | +(walk<br>2.5y)      | +(walk<br>23m)       | /                    |
| Epilepsy           | -                       | Moderate             | moderate             | -                    | +                    | severe               | severe               | -                    | -                    | -                    |
| Brain MR           | Partial CCA, et al      | CCH                  | CCH                  | /                    | CCA, et al           | CCA                  | CCA                  | CCH                  | CCH,<br>PVLM         | CCH                  |
| Behavior problem   | /                       | ADHD,<br>aggressive  | stereotypic          | ADHD                 | /                    | /                    | Self-injury          | -                    | ASD                  | /                    |
| Hypotonia          | /                       | +                    | +                    | +                    | -                    | +                    | /                    | +                    | +                    | -                    |
| Feeding problem    | +                       | -                    | +                    | -                    | +                    | /                    | +                    | -                    | +                    | -                    |
| Hearing loss       | /                       | -                    | -                    | -                    | +                    | -                    | -                    | -                    | +                    | -                    |
| Extremities/spine  | /                       | /                    | N                    | N                    | N                    | +                    | /                    | Hyper.               | Hyper.               | /                    |
| Heart              | PDA, VSD, PFO,<br>et al | /                    | N                    | N                    | N                    | BAV, DAA             | N                    | /                    | N                    | /                    |
| PMID               | 36209351                | 33106617             | 33106617             | 33106617             | 31531803             | 33106617             | 33106617             | 33106617             | 33106617             | 33106617             |

Supplementary Table S1. The clinical features of the patients carried likely pathogenic/ pathogenic variants of PPP2R1A (continue)

Supplementary Table S1. The clinical features of the patients carried likely pathogenic/ pathogenic variants of PPP2R1A (continue)

| Individual         | 39                   | 40                   | 41                   | 42                   | 43                      | 44                              | 45                   | 46                   | 47                   | 48                   |
|--------------------|----------------------|----------------------|----------------------|----------------------|-------------------------|---------------------------------|----------------------|----------------------|----------------------|----------------------|
| Age/Sex            | 5y/M                 | 3y/M                 | 4y/M                 | 1y6m/M               | 2y/M                    | 16m/M                           | /                    | /                    | /                    | /                    |
| Variant            | c.773G>A,<br>p.R258H | c.773G>A,<br>p.R258H | c.773G>A,<br>p.R258H | c.773G>A,<br>p.R258H | c.773G>A,<br>p.R258H    | c.773G>A,<br>p.R258H            | c.536C>A,<br>p.P179H | c.544C>T,<br>p.R182W | c.547C>T,<br>p.R183W | c.773G>A,<br>p.R258H |
| Inheritance        | <i>De novo</i>          | <i>De novo</i>                  | NA                   | <i>De novo</i>       | <i>De novo</i>       | NA                   |
| Birth size         | N                    | N                    | SGA                  | N                    | N                       | SGA                             | /                    | /                    | /                    | /                    |
| Height             | N                    | N                    | N                    | N                    | SS                      | SS                              | /                    | /                    | /                    | /                    |
| Head circumference | micro                | micro                | -3.5SD               | -3SD                 | micro                   | micro                           | micro                | micro                | micro                | micro                |
| DD/ID              | ID, severe           | severe               | ID,<br>moderate      | DD                   | DD                      | ID/DD                           | ID                   | ID                   | ID                   | ID/DD                |
| Language delay     | + (30 word)          | +                    | Severe               | +                    | +                       | + (No word)                     | /                    | /                    | /                    | /                    |
| Motor delay        | +(walk 3y)           | /                    | + (walk 18m)         | /                    | +                       | + (can't crawl/sit)             | /                    | /                    | /                    | /                    |
| Epilepsy           | +                    | -                    | Mild                 | -                    | /(Once febrile seizure) | -                               | /                    | /                    | /                    | /                    |
| Brain MR           | CCH                  | /                    | CCH                  | CCH                  | CCA                     | lateral ventriculomegaly, et al | CCA                  | CCA                  | CCA                  | CCH                  |
| Behavior problem   | hyperactivity        | autistic, stereotypy | ADHD                 | -                    | /                       | /                               | /                    | /                    | /                    | Autistic behavior    |
| Hypotonia          | +                    | +                    | -                    | +                    | +                       | +                               | /                    | /                    | /                    | +                    |
| Feeding problem    | /                    | /                    | -                    | -                    | +                       | /                               | /                    | /                    | /                    | /                    |
| Hearing loss       | /                    | /                    | /                    | -                    | /                       | /                               | /                    | /                    | /                    | /                    |
| Extremities/spine  | /                    | /                    | /                    | /                    | /                       | scoliosis                       | /                    | /                    | /                    | /                    |
| Heart              | /                    | /                    | /                    | /                    | N                       | /                               | /                    | /                    | /                    | /                    |
| PMID/clinvar       | 26168268             | 30755392             | 33106617             | 33106617             | Chinese paper           | 34716204                        | VCV001064777         | VCV000190312         | VCV000376505         | VCV000217458         |

Supplementary Table S1. The clinical features of the patients carried likely pathogenic/ pathogenic variants of PPP2R1A (continue)

| Individual         | 49               | 50               | 51                   | 52                   | 53                   | 54                   | 55                   | 56                   | 57                   | 58                   | 59                   | 60                   |
|--------------------|------------------|------------------|----------------------|----------------------|----------------------|----------------------|----------------------|----------------------|----------------------|----------------------|----------------------|----------------------|
| Age/Sex            | ?/F              | ?/M              | ?/M                  | ?/M                  | ?/M                  | ?/F                  |
| Variant            | c.2T>C,<br>p.M1T | c.2T>C,<br>p.M1T | c.533C>G,<br>p.T178S | c.533C>A,<br>p.T178N | c.536C>T,<br>p.P179L | c.544C>T,<br>p.R182W | c.544C>T,<br>p.R182W | c.544C>T,<br>p.R182W | c.656C>T,<br>p.S219L | c.658G>A,<br>p.V220M | c.658G>A,<br>p.V220M | c.772C>A,<br>p.R258S |
| Inheritance        | <i>De novo</i>   | <i>De novo</i>   | <i>De novo</i>       | <i>De novo</i>       | <i>De novo</i>       | <i>De novo</i>       | <i>De novo</i>       | <i>De novo</i>       | <i>De novo</i>       | <i>De novo</i>       | <i>De novo</i>       | <i>De novo</i>       |
| Birth size         | /                | /                | /                    | /                    | /                    | /                    | /                    | /                    | /                    | /                    | /                    | /                    |
| Height             | /                | /                | /                    | /                    | /                    | /                    | /                    | /                    | /                    | /                    | /                    | /                    |
| Head circumference | macro            | /                | /                    | /                    | /                    | /                    | /                    | /                    | /                    | /                    | micro                | micro                |
| DD/ID              | DD,<br>moderate  | DD,<br>moderate  | DD,<br>moderate      | DD                   | ID                   | /                    | /                    | DD                   | DD                   | /                    | DD,<br>severe        | DD,<br>severe        |
| Language delay     | /                | /                | /                    | +                    | /                    | /                    | /                    | /                    | /                    | /                    | +                    | /                    |
| Motor delay        | /                | /                | /                    | /                    | /                    | /                    | +                    | /                    | /                    | /                    | +                    | /                    |
| Epilepsy           | /                | /                | /                    | /                    | +                    | +                    | /                    | /                    | /                    | +                    | +                    | /                    |
| Brain MR           | /                | /                | /                    | /                    | CCA                  | CCH                  | CCA                  | CCA                  | CCH                  | CCA                  | CCA,                 | CCH                  |
| Behavior problem   | autistic         | /                | /                    | /                    | /                    | /                    | /                    | /                    | /                    | /                    | /                    | ADHD                 |
| Hypotonia          | +                | /                | /                    | +                    | /                    | +                    | /                    | +                    | /                    | /                    | +                    | /                    |
| Feeding problem    | /                | GR               | /                    | /                    | /                    | /                    | /                    | /                    | /                    | /                    | +                    | /                    |
| Hearing loss       | /                | +                | /                    | +                    | /                    | /                    | /                    | /                    | /                    | /                    | /                    | /                    |
| Extremities/spine  | +                | /                | /                    | /                    | +                    | +                    | /                    | +                    | /                    | +                    | +                    | /                    |
| Heart              | /                | /                | /                    | /                    | /                    | /                    | /                    | PDA                  | /                    | /                    | /                    | /                    |
| Decipher patients  | 274685           | 275646           | 457603               | 268550               | 259358               | 258589               | 263907               | 304649               | 428704               | 280097               | 379691               | 286623               |

Note: N, normal; -, not present the feature; +, present the feature; /, no data or inapplicability; hyperm., hypermobility; F, female; M, male; ADHD, Attention deficit hyperactivity disorder; CCA, corpus callosum agenesis; CCH, hypoplastic corpus callosum; GR, gastroesophageal reflux; LVH, left ventricular hypertrophy; PVLM, periventricular leukomalacia; ASD, BAV, bicuspid aortic valve; DAA, dilated aorta ascendens; PS, pulmonic stenosis; PFO, patent foramen ovale; VSD, micro, microcephaly; macro, macrocephaly; NA, indicates cases without parental origin.

Supplementary Table S2. Twenty-one P/LP variants of PPP2R1A gene in 66 patients

| Groups ID | cDNA change | Amino acid change | Evidence code combinations based on ACMG | Cases (n) | Functional characterization                                                                                                               |
|-----------|-------------|-------------------|------------------------------------------|-----------|-------------------------------------------------------------------------------------------------------------------------------------------|
|           | c.2T>C      | p.Met1Thr         | PS2+PP2+PM2_PP                           | 2         | NA                                                                                                                                        |
|           | c.96C>G     | p.Ile32Met        | PS2+PP2 +PM2_PP                          | 1         | NA                                                                                                                                        |
|           | c.421T>A    | p.Phe141Ile       | PS2+PP2 +PS3+PM2_PP                      | 1         | Impair binding with B56α, B56β, B56γ1, B56ε, PR71, C subunit                                                                              |
|           | c.455C>T    | p.Ser152Phe       | PS2+PP2 +PM2_PP                          | 1         | Decreased number of dendritic spines in hippocampal neurons                                                                               |
| Group 1   | c.532A>T    | p.Thr178Ser       | PS2+PM1+PP2 +PM2_PP                      | 2         | NA                                                                                                                                        |
|           | c.533C>A    | p.Thr178Asn       | PS2+PM1+PP2 +PS3+PM2_PP                  | 2         | Impair binding with B56α, B56β, B56γ1, B56ε                                                                                               |
|           | c.536C>T    | p.Pro179Leu       | PS2+PM1+PP2 +PS3+ PM2_PP                 | 3         | Impair binding with B55α, B56α, B56β, B56γ1, B56ε, C subunit                                                                              |
|           | c.536C>A    | p.Pro179His       | PM1+PM2_PP+PM5+PP2+PP3                   | 2         | NA                                                                                                                                        |
| Group 2   | c.538A>G    | p.Met180Val       | PS2+PM1+PP2+PS3+PS4+PM2_PP               | 4         | Impair binding with B56α, B56β, B56γ1, B56ε, PR71                                                                                         |
|           | c.539T>C    | p.Met180Thr       | PS2+PM1+PP2+PS3+PS4+PM2_PP               | 6         | Impair binding with B56α, B56β, B56γ1, B56ε, PR71                                                                                         |
|           | c.539T>A    | p.Met180Lys       | PS2+PM1+PP2 +PS3+PM2_PP                  | 1         | Impair binding with B55α, B56α, B56β, B56γ1, B56ε                                                                                         |
|           | c.539T>G    | p.Met180Arg       | PS2+PP2 +PM2_PP                          | 1         | NA                                                                                                                                        |
| Group 3   | c.544C>T    | p.Arg182Trp       | PS2+PM1+PP2+PS3+PS4+PM2_PP               | 12        | Impair binding with B55α, B56α, B56β, B56γ1, B56ε, PR71, C subunit; increased phosphorylation of GSK-3β Ser <sup>9</sup>                  |
|           | c.547C>T    | p.Arg183Trp       | PS2+PM1+PP2+PS3+PM2_PP                   | 3         | Impair binding with B55α, B56α, B56β, B56γ1, B56ε, PR71, C subunit                                                                        |
|           | c.548G>A    | p.Arg183Gln       | PS2+PP2 +PM2_PP                          | 3         | hyperphosphorylation of p70S6K Thr <sup>389</sup> and S6 Ser <sup>235/236</sup> , and GSK3β Ser <sup>9</sup> , and Akt Thr <sup>308</sup> |
| Group 4   | c.656C>T    | p.Ser219Leu       | PS2+PP2 +PS3+PS4+PM2_PP                  | 5         | Impair binding with B55α, B56β, B56γ1, B56ε, C subunit                                                                                    |
|           | c.658G>A    | p.Val220Met       | PS2+PP2 +PS3+PS4+PM2_PP                  | 6         | Impair binding with B55α, B56β, C subunit                                                                                                 |
| Group 5   | c.772C>A    | p.Arg258Ser       | PS2+PP2 +PS3+PS4+PM2_PP                  | 2         | Impair binding with B55α, PR71, C subunit                                                                                                 |

|           |                      |                         |   |                                                                       |
|-----------|----------------------|-------------------------|---|-----------------------------------------------------------------------|
| c.773G>A  | p.Arg258His          | PS2+PP2 +PS3+PS4+PM2_PP | 7 | Impair binding with B55α, PR71, C subunit                             |
| c.843dupA | p.Asp282Arg<br>fs*14 | PVS1+PS2+PS3+PM2_PP     | 1 | Truncating protein, impair binding with endogenous B56δ and C subunit |
| c.1493G>T | p.Arg498Leu          | PM6+PS3+PM2_PP+PP2+PP3  | 1 | Impaired binding with endogenous B56δ and C subunit                   |

Note: n, number.

Supplementary Table S3. Four clinical features of the patients detected six common site variants

| Variants                                         | Macrocephaly/microcephaly                                                                     | CCA/CCH      | Hypotonia    | Epilepsy    | Individuals (n) |
|--------------------------------------------------|-----------------------------------------------------------------------------------------------|--------------|--------------|-------------|-----------------|
| c.536C>T, p.Phe179Leu &<br>c.536C>A, p.Phe179His | Microcephaly 100% (4/4)                                                                       | 100% (5/5)   | 100% (3/3)   | 50% (2/4)   | 5               |
| c.538A>G, p.Met180Val &<br>c.539T>C, p.Met180Thr | Macrocephaly 100% (10/10)                                                                     | 25% (2/8)    | 100% (10/10) | 0% (0/9)    | 10              |
| c.544C>T, p.Arg182Trp                            | Microcephaly 44.4% (4/9)<br>Normal head circumference 44.4% (4/9)<br>Macrocephaly 11.1% (1/9) | 100% (12/12) | 87.5% (7/8)  | 87.5% (7/8) | 12              |
| c.656C>T, p.Ser219Leu                            | Microcephaly 50% (2/4)<br>Normal head circumference 50% (2/4)                                 | 100% (4/4)   | 75% (3/4)    | 75% (3/4)   | 5               |
| c.658G>A, p.Val220Met                            | Microcephaly 50% (2/4)<br>Normal head circumference 50% (2/4)                                 | 100% (6/6)   | 100% (4/4)   | 66.7% (4/6) | 6               |
| c.772C>A, p.Arg258Ser &<br>c.773G>A, p.Arg258His | Microcephaly 100% (9/9)                                                                       | 87.5% (7/8)  | 75% (6/8)    | 33.3% (2/6) | 9               |

Note: CCA, corpus callosum agenesis; CCH, hypoplastic corpus callosum; n, number.
